# Supplementary material for: Thickness and substrate dependences of phase transition, drug release and antibacterial properties of PNIPAm-co-AAc films
Source: Royal Society of Chemistry journal article supplement (doi:10.1039/c5ra13972d), 2015-01-01
Supplement: c5ra13972d1.pdf [file c5ra13972d1.pdf]

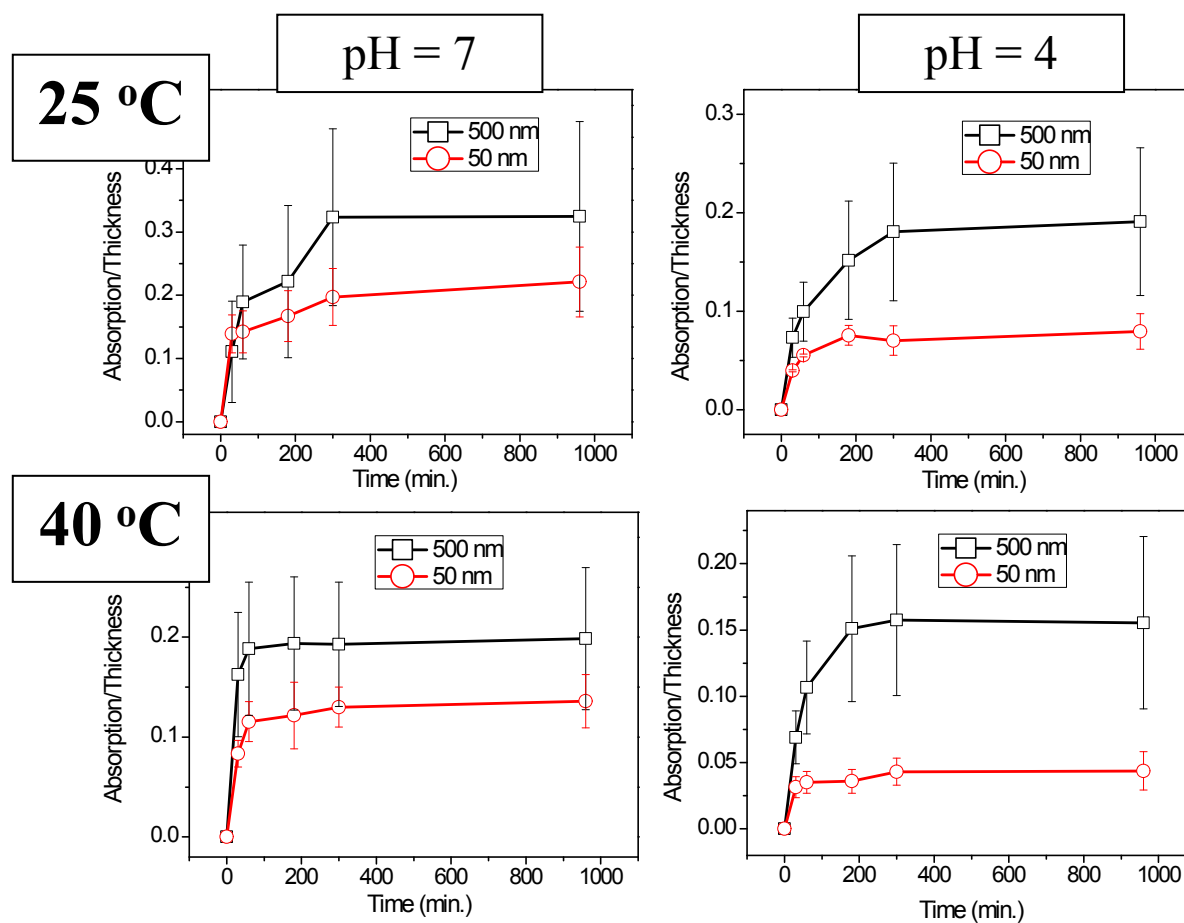

Normalized absorption coefficient at 590 nm of solutions of extracted CV from 50 nm and 500 nm thick PNIPAm-co-AAc films deposited on Au substrates. Releases were measured for temperature below (25°C) and above (40°C) LCST.
